# Supplementary material for: SOX2 is sequentially required for progenitor proliferation and lineage specification in the developing pituitary
Source: Oxford University Press journal article supplement (doi:10.1242/dev.137984), 2016-01-01
Supplement: dev137984supp.pdf [file dev137984supp.pdf]

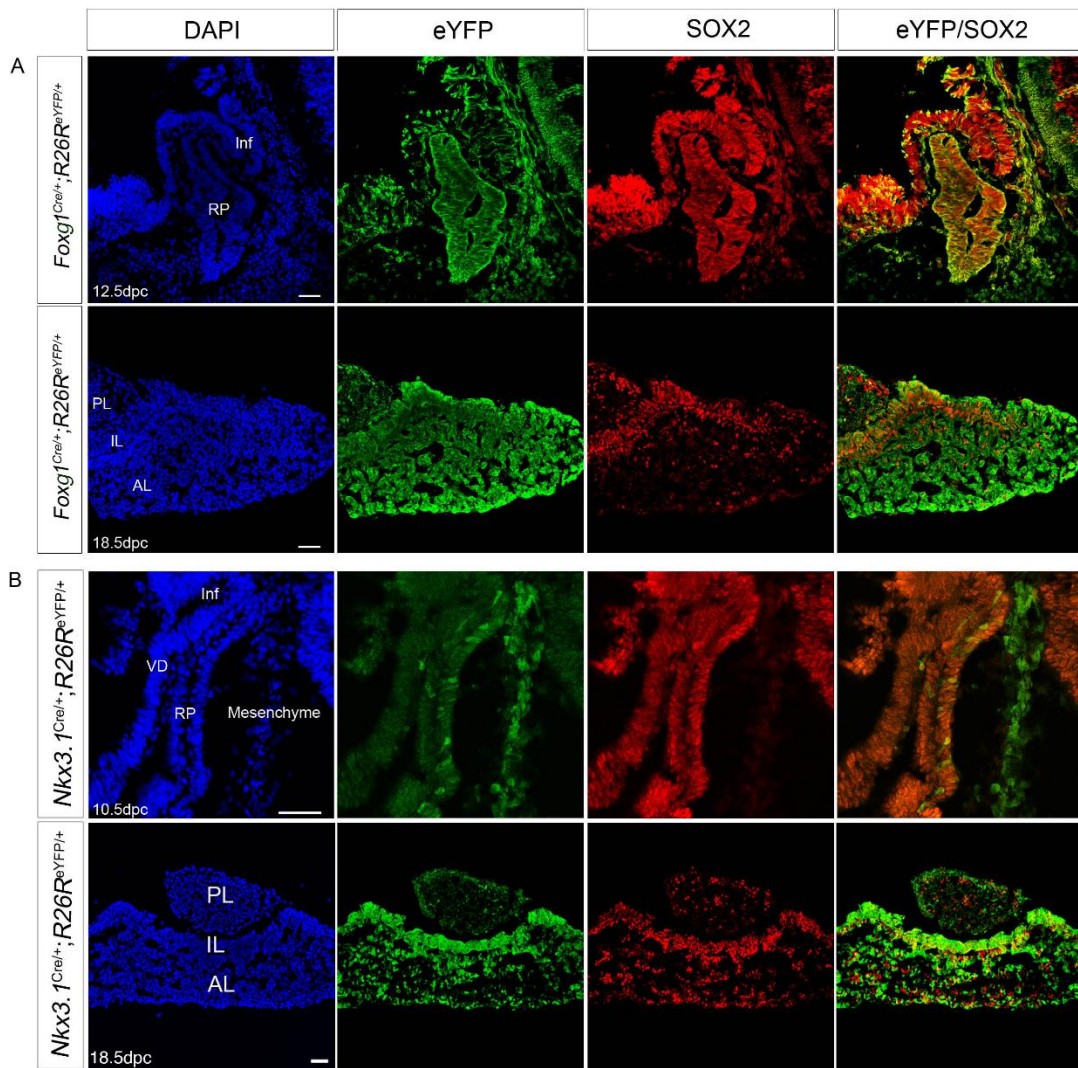

**Fig. S1. Cre drivers lineage tracing analysis in embryonic pituitaries.**

A) *Foxg1<sup>Cre</sup>* lineage tracing analysis. Immunofluorescence for eYFP and SOX2, at 12.5 and 18.5dpc in *Foxg1<sup>Cre</sup>;R26R<sup>eYFP</sup>* embryos. eYFP is observed in all cells of RP at 12.5dpc and in some cells in the VD (these are not present on a pure 129 background, data not shown). At the end of gestation the pituitary is essentially ubiquitously eYFP positive.

B) *Nkx3.1<sup>Cre</sup>* lineage tracing analysis. Immunofluorescence for eYFP and SOX2 at 10.5dpc and 18.5dpc in *Nkx3.1<sup>Cre</sup>;R26R<sup>eYFP</sup>* embryos. eYFP is initially observed in a small number of cells in RP at 10.5dpc. By 18.5dpc nearly all cells in IL are eYFP positive. In the anterior lobe, eYFP positive cells also make a significant contribution. 10.5dpc – 12.5dpc sections are orientated sagittally, 18.5dpc are orientated coronally. Scale bar = 50µm.

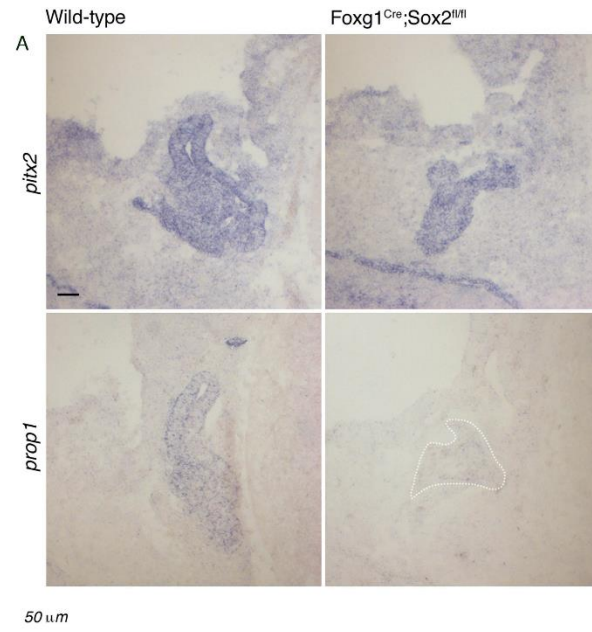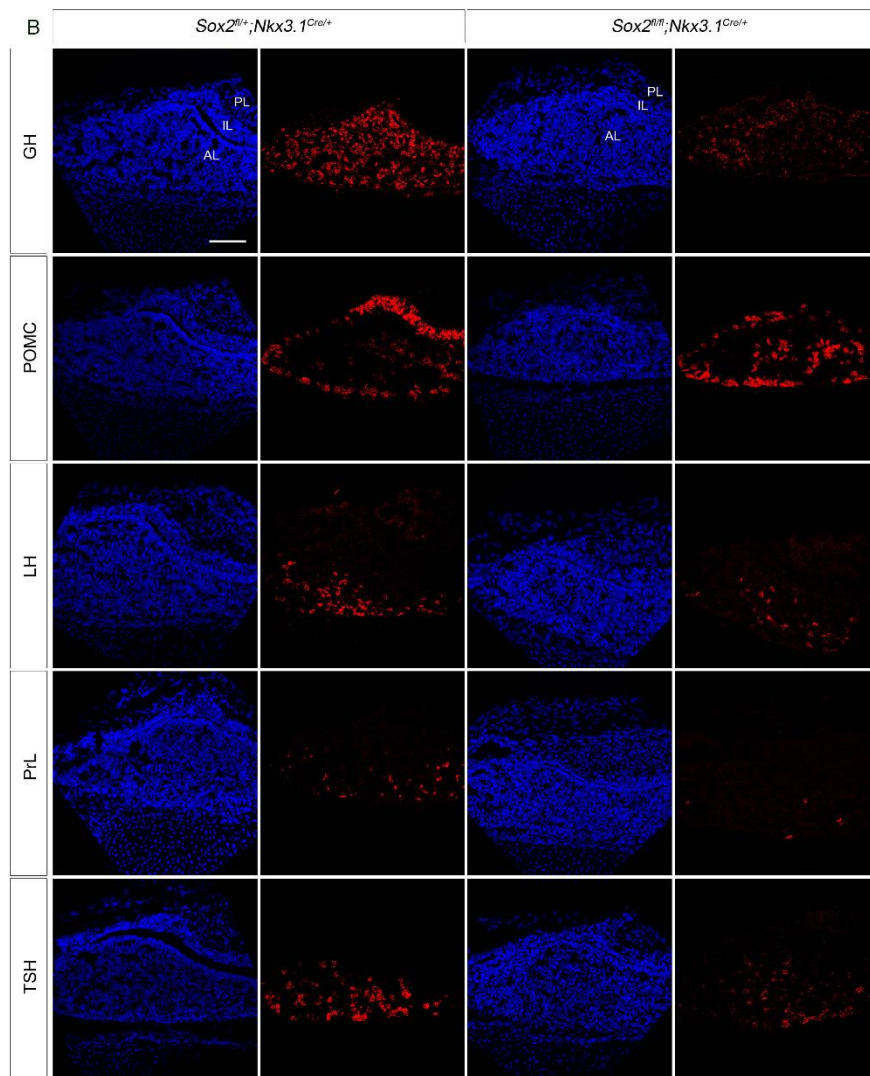

**Fig. S2. Analysis of *Pitx2* and *Prop1* transcripts and reduction in pituitary hormones in *Sox2<sup>fl/fl</sup>;Nkx3.1<sup>Cre/+</sup>* embryos.**

A) *In situ* hybridization for *Pitx2* and *Prop1* at 12.5dpc. *Pitx2* expression is seemingly unaffected by the loss of *Sox2* while *Prop1* expression is clearly downregulated in *Sox2<sup>fl/fl</sup>; Foxg1<sup>Cre/+</sup>* mutants.

B) Immunofluorescence for GH, POMC, LH, PrL and TSH at 18.5dpc. The number of hormone positive cells is generally reduced in *Sox2<sup>fl/fl</sup>;Nkx3.1<sup>Cre/+</sup>* pituitaries compared to *Sox2<sup>fl/+</sup>;Nkx3.1<sup>Cre/+</sup>* ones, with AL corticotrophs appearing less affected than the other endocrine cell types.

Scale bar = 50  $\mu\text{m}$  for A and 100 $\mu\text{m}$  for B.



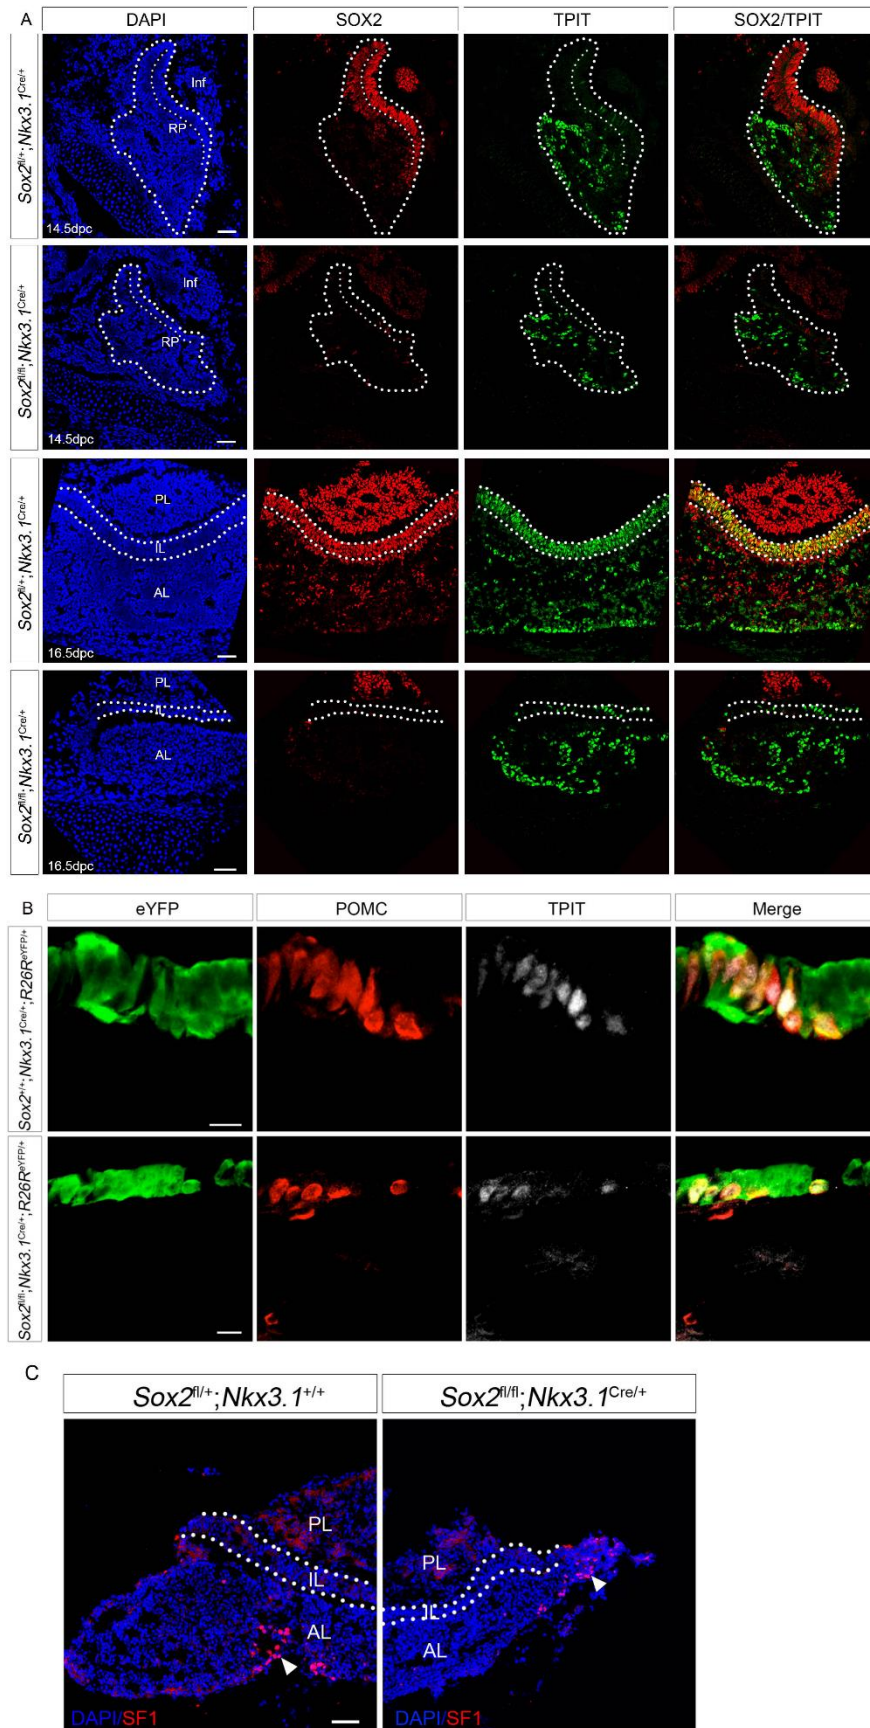

**Fig. S3. Analysis of Tpit and SF1 expression in *Sox2<sup>fl/fl</sup>;Nkx3.1<sup>Cre/+</sup>* embryos.**

A) Immunofluorescence for SOX2 and TPIT at 14.5dpc and 16.5dpc in *Nkx3.1<sup>Cre</sup>* mutants. At 14.5dpc, TPIT is expressed in AL corticotrophs. It is later upregulated in IL melanotrophs, by 16.5dpc, as observed in *Sox2<sup>fl/+</sup>;Nkx3.1<sup>Cre/+</sup>* control embryos. Its expression is dramatically reduced in the IL of *Sox2<sup>fl/fl</sup>;Nkx3.1<sup>Cre/+</sup>* embryos.

B) Immunofluorescence for eYFP, POMC and TPIT at 16.5dpc. TPIT is expressed in all eYFP, POMC positive cells in control *Nkx3.1<sup>Cre/+</sup>; R26R<sup>eYFP/+</sup>* embryos. This is also true in *Sox2<sup>fl/fl</sup>; Nkx3.1<sup>Cre/+</sup>; R26R<sup>eYFP/+</sup>* embryos where TPIT positive cells are also POMC positive.

C) Immunofluorescence for SF1 at 18.5dpc in *Nkx3.1<sup>Cre</sup>* mutants. SF1 is expressed in AL gonadotrophs in both *Sox2<sup>fl/+</sup>;Nkx3.1<sup>Cre/+</sup>* and *Sox2<sup>fl/fl</sup>;Nkx3.1<sup>Cre/+</sup>* embryos (arrows). There is no ectopic expression in IL of *Sox2<sup>fl/fl</sup>;Nkx3.1<sup>Cre/+</sup>* embryos.

Scale bar = 50µm for A and C and 10µm for B.

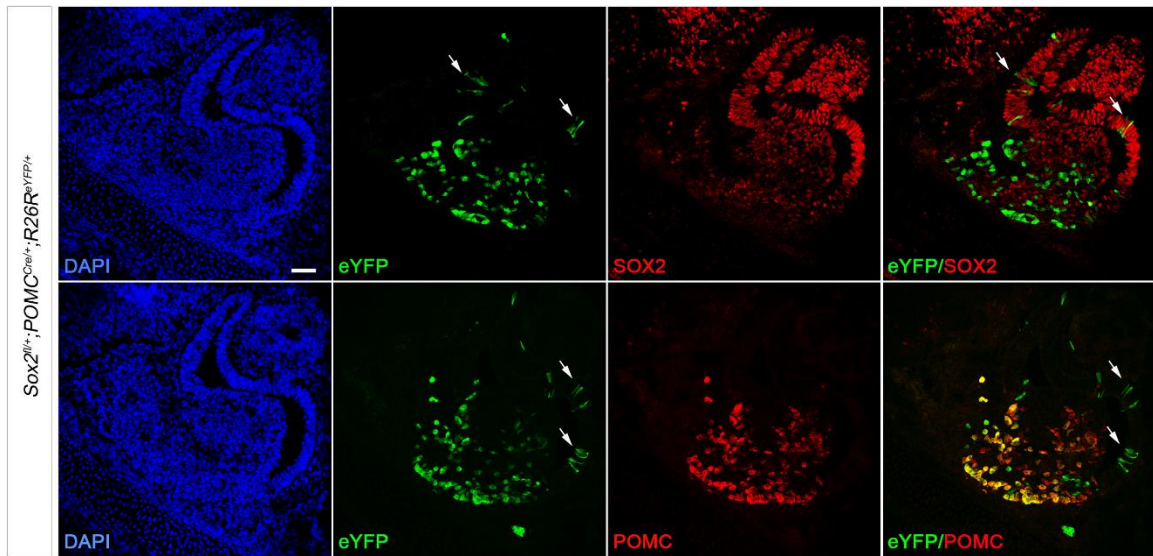

**Fig. S4. Pomc-Cre lineage tracing analysis at 14.5dpc.**

Immunofluorescence for eYFP, SOX2 and POMC in *Sox2<sup>fl/+</sup>;Pomc-Cre;R26R<sup>eYFP</sup>* embryos. eYFP is expressed in the developing AP, always co-localising with endogenous POMC in about half of the corticotrophs, as described (Langlais et al., 2013). In addition, we observe some minor ectopic activity in the SOX2 positive cells lining the cleft, both ventrally and dorsally where the future IL will develop (arrows). These eYFP positive cells do not express POMC and therefore likely represent ectopic activity of the promoter. Scale bar = 50  $\mu$ m.

**Table S1**

List of antibodies used.

|                    | Host specie | Dilution | Source                              | Catalogue Number          |
|--------------------|-------------|----------|-------------------------------------|---------------------------|
| BrdU               | Rat         | 1:100    | Abcam                               | Ab6326                    |
| E-cadherin         | Rat         | 1:1000   | Sigma                               | U3254                     |
| GFP                | Rat         | 1:1000   | Nacalai-Tesque                      | GF090R                    |
| GR                 | Rabbit      | 1:100    | Santa Cruz Biotechnology            | Sc-1004                   |
| LHX3               | Rabbit      | 1:500    | Abcam                               | ab14555                   |
| PAX7               | Mouse       | 1:50     | DSHB                                | <a href="#">AB_528428</a> |
| Pituitary hormones | Rabbit      | 1:500    | NHPP                                |                           |
| SF1                | Rabbit      | 1:300    | Cell Signalling Solution            | 12800                     |
| SIX6               | Rabbit      | 1:500    | Sigma                               | HPA001403                 |
| SOX2               | Goat        | 1:500    | ISL                                 | GT15098                   |
| TBX19              | Rabbit      | 1:1000   | Gift from J. Drouin, IRCM, Montreal |                           |

The secondary antibodies used at a dilution of 1 in 500 were donkey anti-goat, rabbit, rat and goat anti-mouse IgG (H+L) Alexa 488, 568 and 647 (Molecular Probes).
